# Supplementary material
Source: PubMed Central journal article supplement (PMC3067764)
Supplement: supp_85_5_1935__1.pdf [file supp_85_5_1935__1.pdf]

## Supplementary Fig. 1

w6/32 MAb blot:

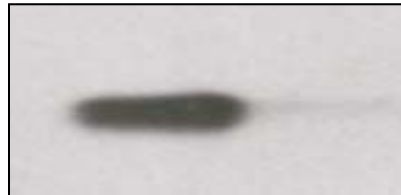

|                    |   |   |
|--------------------|---|---|
| Heavy chain        | + | + |
| Light chain        | + | + |
| Env 183-91 peptide | + | - |

Quality checking of monomer:

The monomer formed after refolding of MHC heavy chain,  $\beta$ 2 microglobulin and in the presence or absence of Env183-91 peptide was loaded on non-reducing native PAGE and Western transferred. The blot was incubated with conformation-specific w6/32 MAb. W6/32 MAb has been reported to recognize a conformational epitope dependent on the association between heavy chain and  $\beta$ 2-microglobulin.

## Supplementary Fig. 2

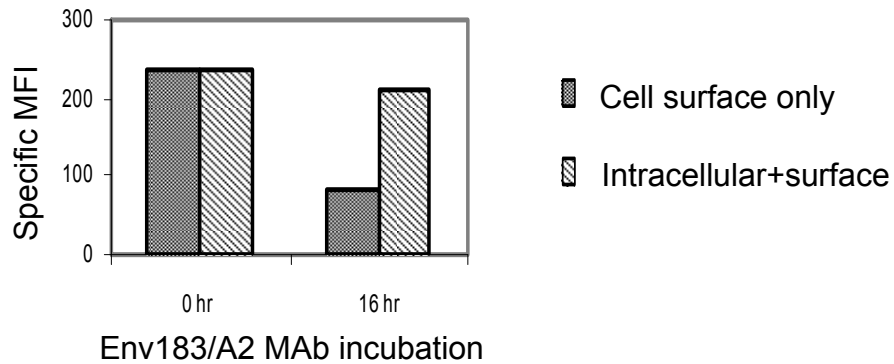

Env183/A2 MAb is able to internalize into HepG2-HBV cells: HepG2-HBV (HepG2-117) cells were incubated with Env183/A2 MAb for 1 hr, washed and then incubated at 37°C. At different time points after incubation, cells were collected, either unfixed or fixed and permeabilized followed by incubation with anti-mouse secondary antibodies. Cells were analyzed by flow cytometry. In 16 hr, more than 60% antibodies were internalized as evidenced by the specific intracellular staining compared to the surface staining.

**Supplementary Table-1:**

| <b>Peptide</b>    | <b>Sequence</b> |
|-------------------|-----------------|
| HBc18-27          | FLPSDFFPSV      |
| HBe183-91         | FLLTRILTI       |
| HBc19-271         | LPSDFFPSI       |
| HBe348-57         | GLSPTVWLSV      |
| HBpol455-63       | GLSRYVARL       |
| Flu M1-58-66      | GILGFVFTL       |
| Flu PA46-54       | FMYSDFHFI       |
| EBV LMP2 426-34   | CLGGLLTMV       |
| EBV BMLF 259-67   | GLCTLVAML       |
| HBX52-60          | HLSLRGLPV       |
| Mage 254-62       | GLYDGMEHL       |
| Mage3-271-79      | FLWGPRALV       |
| SSX 2 (41-49)     | KASEKIFYV       |
| NY-ESO-1 (157-65) | SLLMWITQA       |

Different HLA-A201 binding peptides and their sequences used to address the specificity of TCR-like Mabs are shown.
